# Supplementary material
Source: PubMed Central journal article supplement (PMC4029399)
Supplement: ez500055f_si_001.pdf [file ez500055f_si_001.pdf]

## Supporting Information for

### **Secondary organic aerosol formation from 2-methyl-3-buten-2-ol (MBO) photooxidation: Evidence for acid-catalyzed reactive uptake of epoxides**

Haofei Zhang<sup>1,†</sup>, Zhenfa Zhang<sup>1</sup>, Tianqu Cui<sup>1</sup>, Ying-Hsuan Lin<sup>1</sup>, Neil A. Bhathela<sup>1</sup>,  
John Ortega<sup>2</sup>, David R. Worton<sup>3,4</sup>, Allen H. Goldstein<sup>3,5</sup>, Alex Guenther<sup>2,‡</sup>, Jose L.  
Jimenez<sup>6</sup>, Avram Gold<sup>1</sup>, and Jason D. Surratt<sup>1,\*</sup>

<sup>1</sup> Department of Environmental Sciences and Engineering, Gillings School of Global Public Health, The University of North Carolina at Chapel Hill, Chapel Hill, North Carolina, USA.

<sup>2</sup> National Center for Atmospheric Research, Atmospheric Chemistry Division, Boulder, Colorado, USA.

<sup>3</sup> Department of Environmental Science, Policy and Management, University of California, Berkeley, California, USA.

<sup>4</sup> Aerosol Dynamics Inc., Berkeley, CA, 94710, USA.

<sup>5</sup> Department of Civil and Environmental Engineering, University of California, Berkeley, California, USA.

<sup>6</sup> Cooperative Institute for Research in Environmental Sciences, and Department of Chemistry and Biochemistry, University of Colorado, Boulder, Colorado, USA.

<sup>†</sup> Now at Department of Environmental Science, Policy and Management, University of California, Berkeley, California, USA.

<sup>‡</sup> Now at Atmospheric Sciences and Global Change, Pacific Northwest National Laboratory, Richland, Washington, USA.

<sup>\*</sup> Corresponding author: J. D. Surratt, Department of Environmental Sciences and Engineering, Gillings School of Global Public Health, The University of North Carolina at Chapel Hill, Chapel Hill, NC 27599, USA. ([surratt@unc.edu](mailto:surratt@unc.edu))

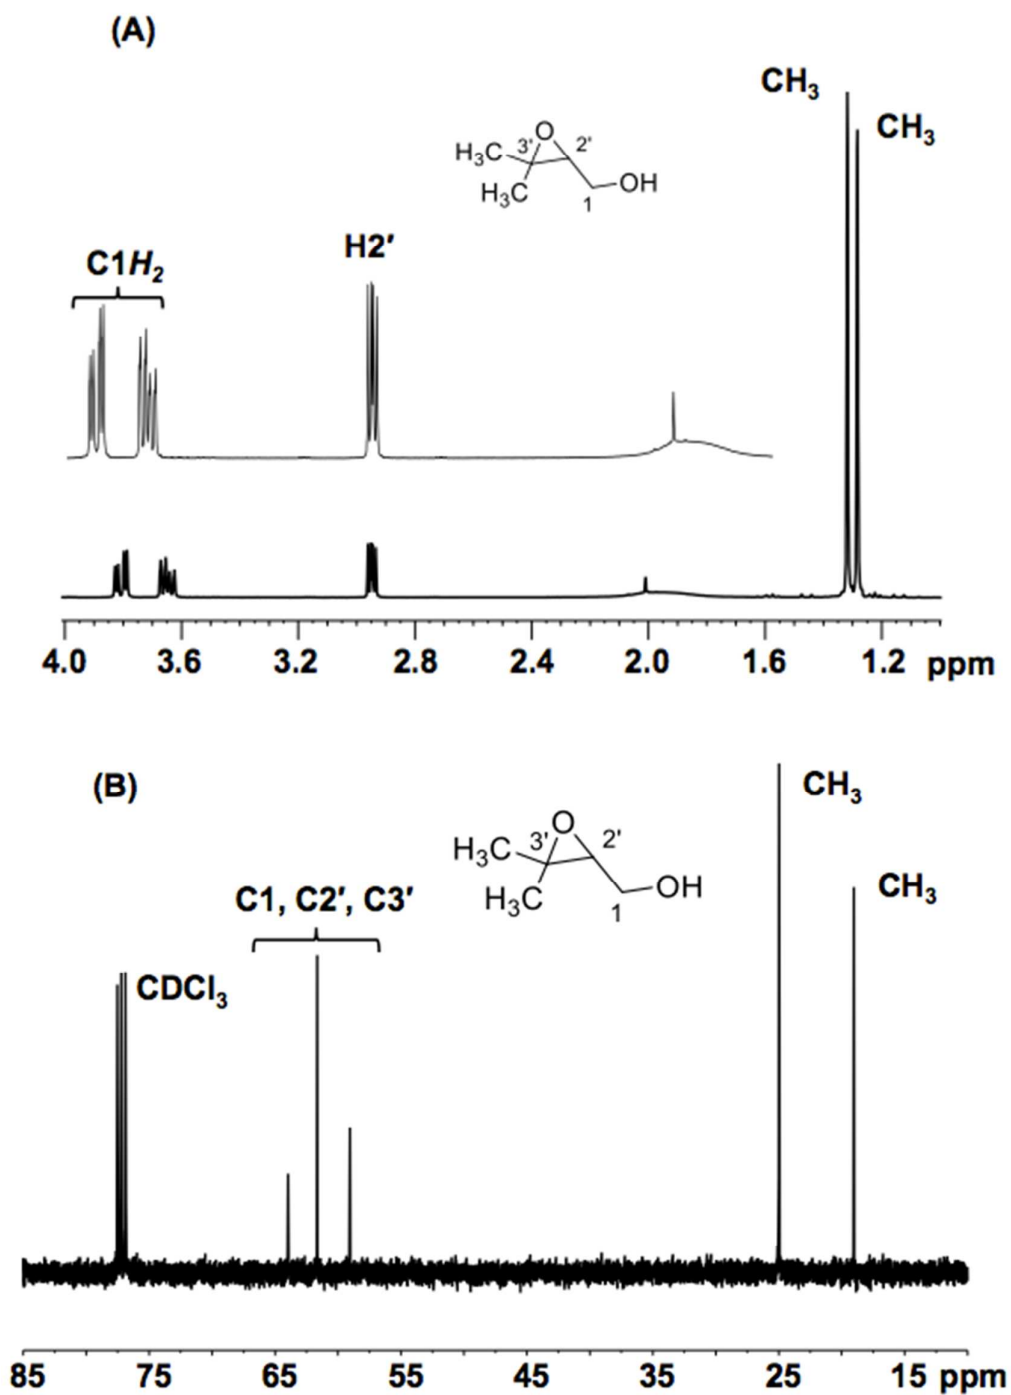

**Figure S1.** NMR of synthetic MBO epoxide ((3,3-dimethyloxiran-2-yl)methanol). (A)

<sup>1</sup>H-NMR (40 MHz, CDCl<sub>3</sub>); (B) <sup>13</sup>C-NMR (100 MHz, CDCl<sub>3</sub>).

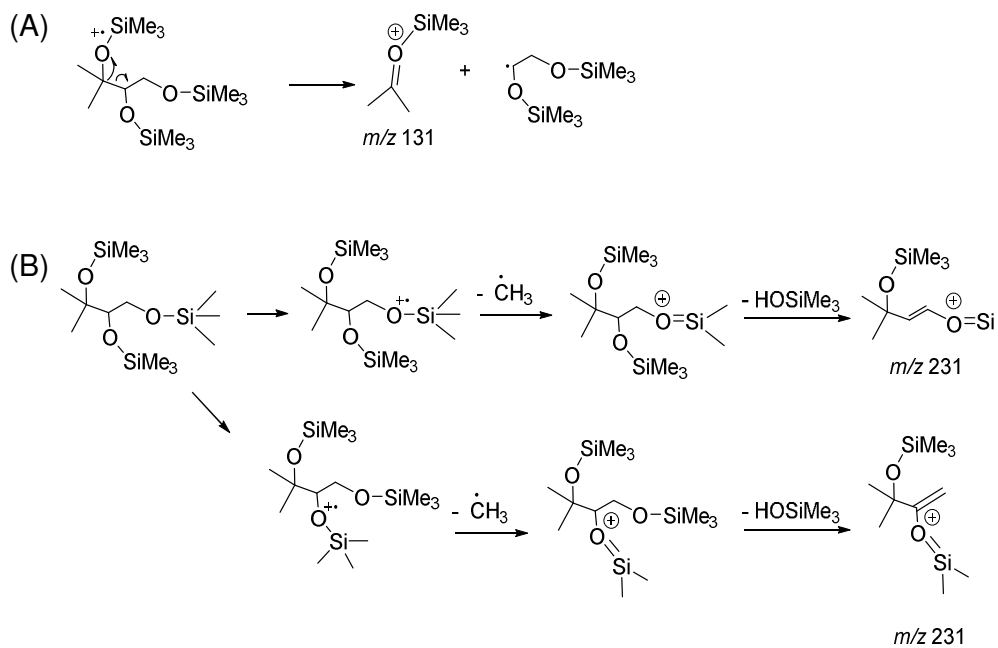

**Figure S2.** Fragmentation Scheme proposed for product ions (A)  $m/z$  131 and (B)  $m/z$  231 in the GC/EI-MS of TMS derivatized DHIP.

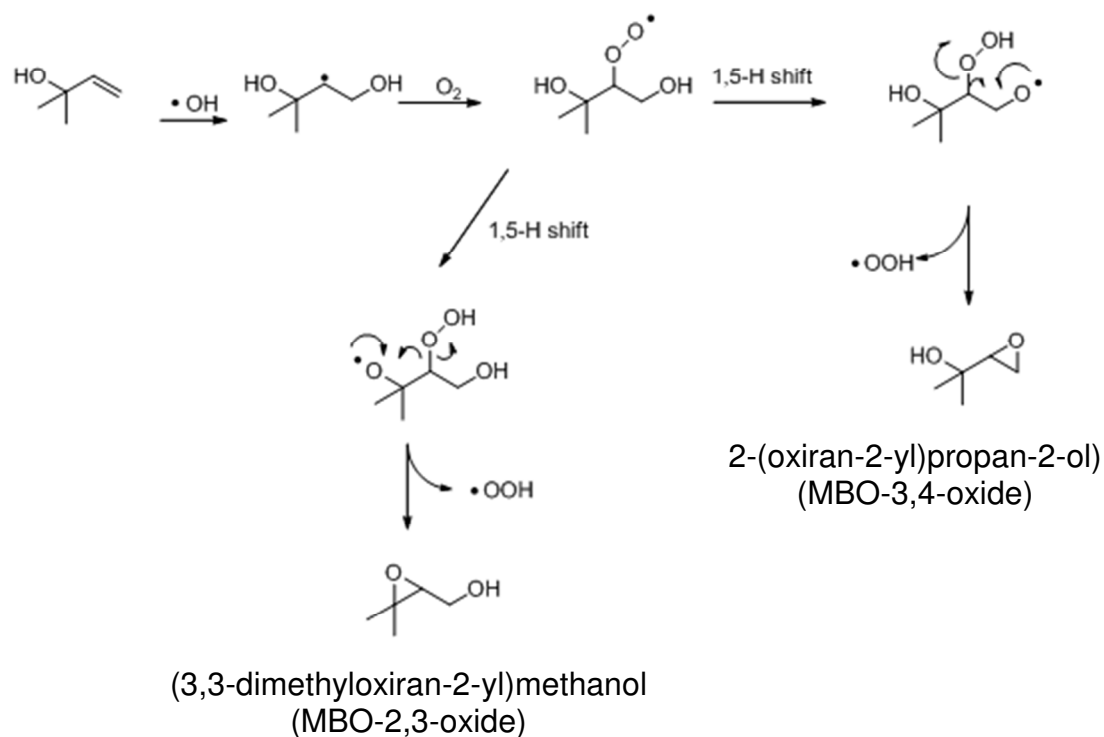

**Figure S3.** Proposed mechanism leading to formation of isomeric MBO epoxides. The first two steps in this scheme follow the proposed mechanism for isoprene epoxydiols (IEPOX) to yield a hydroxyperoxy radical. The peroxy radical undergoes a 1,5-H shift followed by elimination of HO<sub>2</sub>. As the scheme indicates, two isomers of MBO oxide are predicted.
